# Supplementary material for: Influence of formation temperature on the morphology of MoS2 and its catalytic properties in the hydrogenation of isomeric bromoquinolines to bromo-1,2,3,4-tetrahydroquinolines
Source: Royal Society of Chemistry journal article supplement (doi:10.1039/d5dt00065c), 2025-01-01
Supplement: d5dt00065c1.pdf [file d5dt00065c1.pdf]

## Supporting Information

### The influence of formation temperature on the morphology of MoS<sub>2</sub> and its catalytic properties in hydrogenation of isomeric bromoquinolines to bromo-1,2,3,4-tetrahydroquinolines

Anastasia V. Terebilenko<sup>a,b</sup>, Maryna V. Olenchuk<sup>c</sup>, Denys O. Mazur<sup>a</sup>, Andrii S. Nikolenko<sup>c,d</sup>, Vadym I. Popenko<sup>d</sup>, Galyna I. Dovbeshko<sup>c</sup>, Oleksii Bezkravnyi<sup>e</sup>, Tomash Sabov<sup>d</sup>, Boris M. Romanyuk<sup>d</sup>, Volodymyr N. Poroshin<sup>c</sup>, Serhiy V. Ryabukhin<sup>b,f,g</sup>, Dmytro M. Volochnyuk<sup>b,f,g</sup>, Sergey V. Kolotilov <sup>\*a</sup>

<sup>a</sup> *L.V. Pisarzhevskii Institute of Physical Chemistry, National Academy of Sciences of Ukraine, 31, pr. Nauky, 03028 Kyiv, Ukraine. E-mail: s.v.kolotilov@gmail.com.*

<sup>b</sup> *Enamine Ltd., 78 Winston Churchill St., 02094 Kyiv, Ukraine.*

<sup>c</sup> *Institute of Physics, National Academy of Sciences of Ukraine, 46, pr. Nauky, 03028 Kyiv, Ukraine.*

<sup>d</sup> *V.E.Lashkarev Institute of Semiconductor Physics, National Academy of Sciences of Ukraine, 41, pr. Nauky, 03028 Kyiv, Ukraine.*

<sup>e</sup> *Institute of Low Temperature and Structure Research PAS, Okólna 2, 50-422 Wrocław, Poland*

<sup>f</sup> *Institute of Organic Chemistry, National Academy of Sciences of Ukraine, Akademika Kukharya Street 5, 02660 Kyiv, Ukraine.*

<sup>g</sup> *Institute of High Technologies, Taras Shevchenko National University of Kyiv, Volodymyrska Street 60, 01601 Kyiv, Ukraine.*

## Contents

**Table S1.** Yields of MoS<sub>2</sub> samples for different entries (theoretically expected weight was 1000 mg in each case).

**Table S2.** The products of bromoquinolines hydrogenation in the presence of MoS130, MoS135 and MoS140.

**Table S3.** The products of chloroquinolines hydrogenation in the presence of MoS135 and MoS140.

**Fig. S1.** SEM image of particles, suspended in the reaction mixture in the synthesis of MoS120.

**Fig. S2.** XRD patterns of MoS120-MoS180 samples aged for 8 months.

**Fig. S3.** TEM images of the MoS120 – MoS180 samples.

**Fig. S4.** <sup>1</sup>H NMR spectra of the concentrated reaction mixtures after hydrogenation of quinoline in the presence MoS130, MoS135, MoS140 (100 °C, 100 atm, 10 mol. % of MoS<sub>2</sub>, 24 h).

**Fig. S5.** <sup>1</sup>H NMR spectra of the concentrated reaction mixture after hydrogenation of quinoline the presence bulk MoS<sub>2</sub> (10 mol. % of MoS<sub>2</sub>, 100 °C, 100 atm, 24 h).

**Fig. S6.** <sup>1</sup>H NMR spectra of the concentrated reaction mixtures after hydrogenation of quinoline in the presence MoS140 (100 °C, 100 atm, 24 h) at different catalyst loading.

**Fig. S7.** <sup>1</sup>H NMR spectra of the concentrated reaction mixtures after hydrogenation of quinoline at different temperatures in the presence MoS140 (10 mol. % of MoS<sub>2</sub>, 100 atm, 24 h).

**Fig. S8.**  $^1\text{H}$  NMR spectra of the concentrated reaction mixtures after hydrogenation of quinoline at different pressures in the presence MoS140 (10 mol. % of  $\text{MoS}_2$ , 100 °C, 24 h).

**Fig. S9.**  $^1\text{H}$  NMR spectra of the concentrated reaction mixtures after hydrogenation of quinoline the presence MoS140 (10 mol. % of  $\text{MoS}_2$ , 100 °C, 100 atm, 24 h) in water or toluene.

**Fig. S10.**  $^1\text{H}$  NMR spectra of the concentrated reaction mixture after hydrogenation of quinoline the presence MoS140 recycled after one run (10 mol. % of  $\text{MoS}_2$ , 100 °C, 100 atm, 24 h).

**Fig. S11.**  $^1\text{H}$  NMR spectra of the concentrated reaction mixtures after hydrogenation of 5-bromoquinoline in presence of MoS130, MoS135, MoS140 (100 °C, 100 atm, 10 mol. % of  $\text{MoS}_2$  48 h).

**Fig. S12.**  $^1\text{H}$  NMR spectra of the concentrated reaction mixtures after hydrogenation of 6-bromoquinoline in presence of MoS130, MoS135, MoS140 (100 °C, 100 atm, 10 mol. % of  $\text{MoS}_2$  48 h).

**Fig. S13.**  $^1\text{H}$  NMR spectra of the concentrated reaction mixtures after hydrogenation of 7-bromoquinoline in presence of MoS130, MoS135, MoS140 (100 °C, 100 atm, 10 mol. % of  $\text{MoS}_2$  48 h).

**Fig. S14.**  $^1\text{H}$  NMR spectra of the concentrated reaction mixtures after hydrogenation of 8-bromoquinoline in presence of MoS130, MoS135, MoS140 (100 °C, 100 atm, 10 mol. % of  $\text{MoS}_2$  48 h).

**Fig. S15.**  $^1\text{H}$  NMR spectra of the concentrated reaction mixtures after hydrogenation of 5-chloroquinoline in presence MoS135, MoS140 (100 °C, 100 atm, 10 mol. % of  $\text{MoS}_2$  48 h).

**Fig. S16.**  $^1\text{H}$  NMR spectra of the concentrated reaction mixtures after hydrogenation of 6-chloroquinoline in presence MoS135, MoS140 (100 °C, 100 atm, 10 mol. % of  $\text{MoS}_2$  48 h).

**Fig. S17.**  $^1\text{H}$  NMR spectra of the concentrated reaction mixtures after hydrogenation of 7-chloroquinoline in presence MoS135, MoS140 (100 °C, 100 atm, 10 mol. % of  $\text{MoS}_2$  48 h).

**Fig. S18.**  $^1\text{H}$  NMR spectra of the concentrated reaction mixtures after hydrogenation of 8-chloroquinoline in presence MoS135, MoS140 (100 °C, 100 atm, 10 mol. % of  $\text{MoS}_2$  48 h).

**Table S1.** Yields of MoS<sub>2</sub> samples for different entries (theoretically expected weight was 1000 mg in each case).

| Sample No. | Temperature of synthesis, °C | Yield, g | Yield, % |
|------------|------------------------------|----------|----------|
| MoS120     | 120                          | 0.371    | 37       |
| MoS130     | 130                          | 0.498    | 50       |
| MoS135     | 135                          | 0.525    | 53       |
| MoS140     | 140                          | 0.566    | 57       |
| MoS145     | 145                          | 0.607    | 60       |
| MoS150     | 150                          | 0.639    | 64       |
| MoS160     | 160                          | 0.670    | 67       |
| MoS180     | 180                          | 0.750    | 75       |

**Table S2.** The products of bromoquinolines hydrogenation in the presence of MoS130, MoS135 and MoS140.

| Substrate                                                                           | Product                                                                             | Catalyst      | Yield,<br>% | Conversion,<br>% | Selectivity,<br>% | Reaction by-products a)                                      |
|-------------------------------------------------------------------------------------|-------------------------------------------------------------------------------------|---------------|-------------|------------------|-------------------|--------------------------------------------------------------|
| 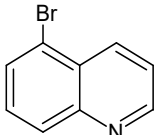   |    | <b>MoS130</b> | 99          | 100              | 99                | 1 % – N-Methyl-5-Bromo-THQ                                   |
|                                                                                     |                                                                                     | <b>MoS135</b> | 60          | 64               | 96                | 3 % – 5- Bromo-N- Methyl-THQ<br>1% – THQ                     |
|                                                                                     |                                                                                     | <b>MoS140</b> | 62          | 66               | 96                | 4 % – N-Methyl-5-Bromo-THQ                                   |
|    |   | <b>MoS130</b> | 23          | 99               | 24                | 15 % – N-Methyl-6-Bromo-THQ<br>44 % – THQ<br>7 % – N-Met-THQ |
|                                                                                     |                                                                                     | <b>MoS135</b> | 25          | 50               | 50                | 12 % – 6-Bromo-N- Methyl-THQ<br>11% – THQ<br>2 % – Quinoline |
|                                                                                     |                                                                                     | <b>MoS140</b> | 17          | 28               | 89                | 9 % – 6-Bromo-N-Methyl-THQ<br>2 % – Quinoline                |
|   |  | <b>MoS130</b> | 97          | 97               | 100               | –                                                            |
|                                                                                     |                                                                                     | <b>MoS135</b> | 86          | 86               | 100               | –                                                            |
|                                                                                     |                                                                                     | <b>MoS140</b> | 26          | 34               | 92                | 8 % – N-Methyl-7-Bromo-THQ –                                 |
|  |  | <b>MoS130</b> | 94          | 97               | 97                | 1 % – THQ<br>2 % – N-Methyl-8-Bromo-THQ                      |
|                                                                                     |                                                                                     | <b>MoS135</b> | 76          | 100              | 84                | 16 % – 8-Bromo-N-Methyl-THQ                                  |
|                                                                                     |                                                                                     | <b>MoS140</b> | 28          | 29               | 99                | 1 % – N- Methyl-8-Bromo-THQ                                  |

<sup>a</sup> THQ = 1,2,3,4-tetrahydroquinoline

**Table S3.** The products of chloroquinolines hydrogenation in the presence of MoS135 and MoS140

| Substrate                                                                          | Product                                                                            | Catalyst      | Yield, % | Conversion, % | Selectivity, % | Reaction by-products |
|------------------------------------------------------------------------------------|------------------------------------------------------------------------------------|---------------|----------|---------------|----------------|----------------------|
| 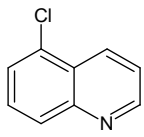  |   | <b>MoS135</b> | 77       | 23            | 100            | –                    |
|                                                                                    |                                                                                    | <b>MoS140</b> | 71       | 71            | 100            | –                    |
|   |   | <b>MoS135</b> | 58       | 58            | 100            | –                    |
|                                                                                    |                                                                                    | <b>MoS140</b> | 69       | 69            | 100            | –                    |
|   |   | <b>MoS135</b> | 72       | 72            | 100            | –                    |
|                                                                                    |                                                                                    | <b>MoS140</b> | 51       | 51            | 100            | –                    |
|  |  | <b>MoS135</b> | 90       | 90            | 100            | –                    |
|                                                                                    |                                                                                    | <b>MoS140</b> | 64       | 64            | 100            | –                    |

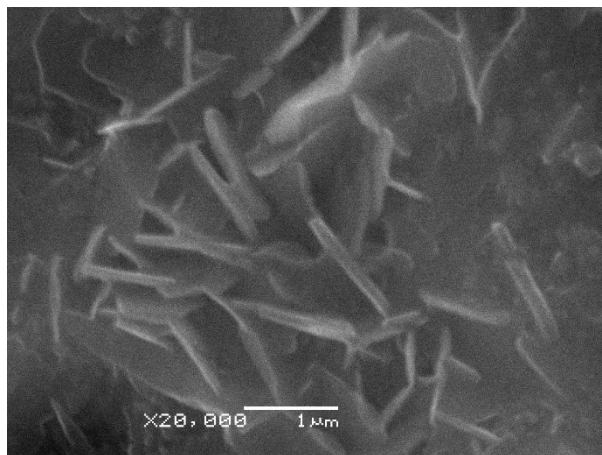

**Fig. S1.** SEM image of particles, suspended in the reaction mixture in the synthesis of MoS120.

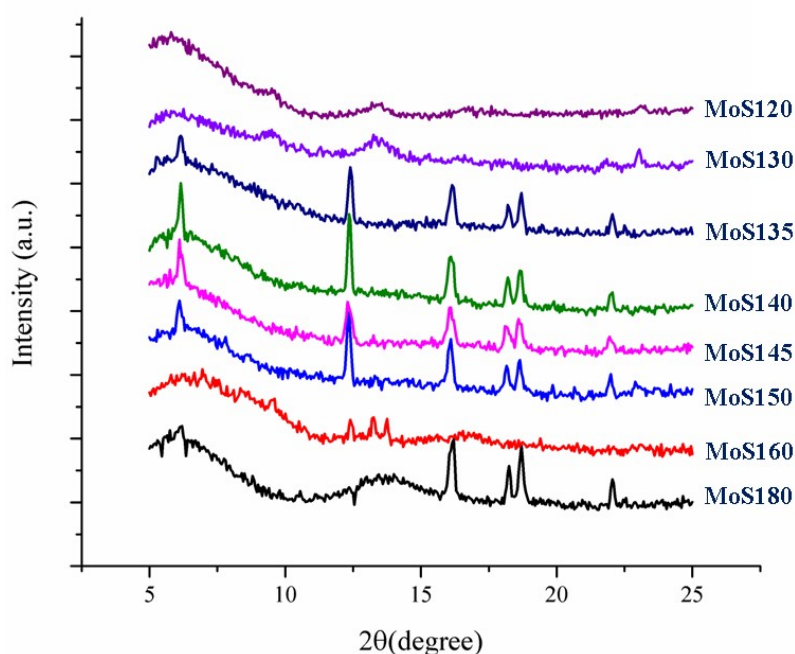

**Fig. S2.** XRD patterns of MoS120-MoS180 samples aged for 8 months.

The reflexes from the crystallographic planes in the stored specimens' XRD patterns had sharpened, however the positions did not correspond to those in the diffractograms of the fresh samples. The apparent phase changes observed in the XRD patterns may well be due to the oxidation of molybdenum disulphide. However, their position does not correspond to the most expected phases for these systems:  $\text{MoO}_2$ ,  $\text{MoO}_3$ , and  $\text{Mo}_2\text{O}_5$  [1]. In addition, variations were noted in a series of powder XRD patterns of aged MoS120-MoS180 samples. Presumably, mixtures of oxides and intercalation products formed upon the aging process.

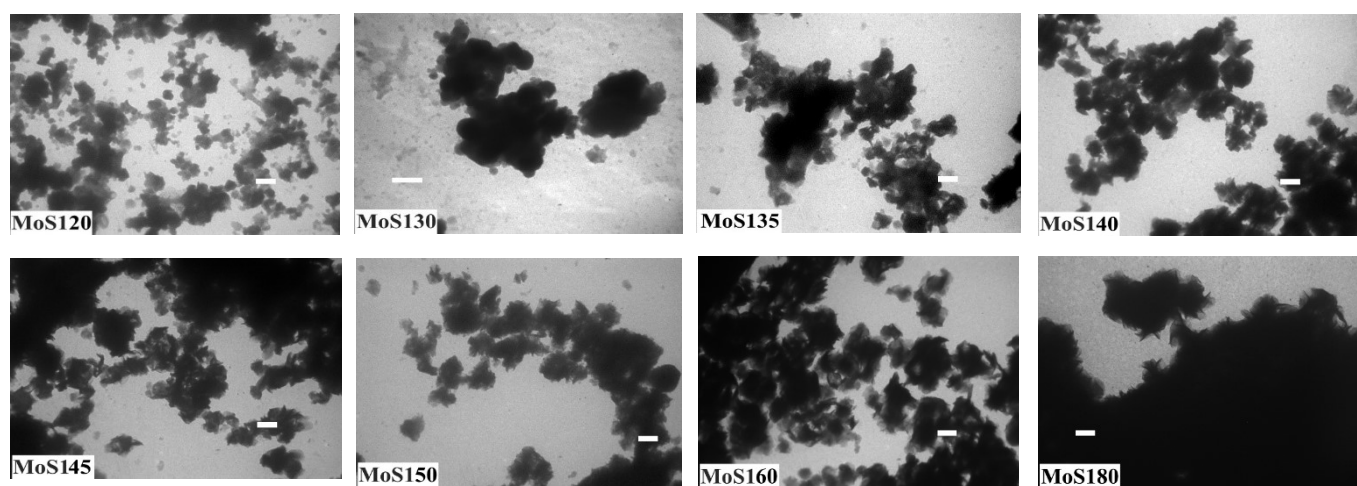

**Fig. S3.** TEM images of the MoS120 – MoS180 samples, the scale bar is 200 nm.

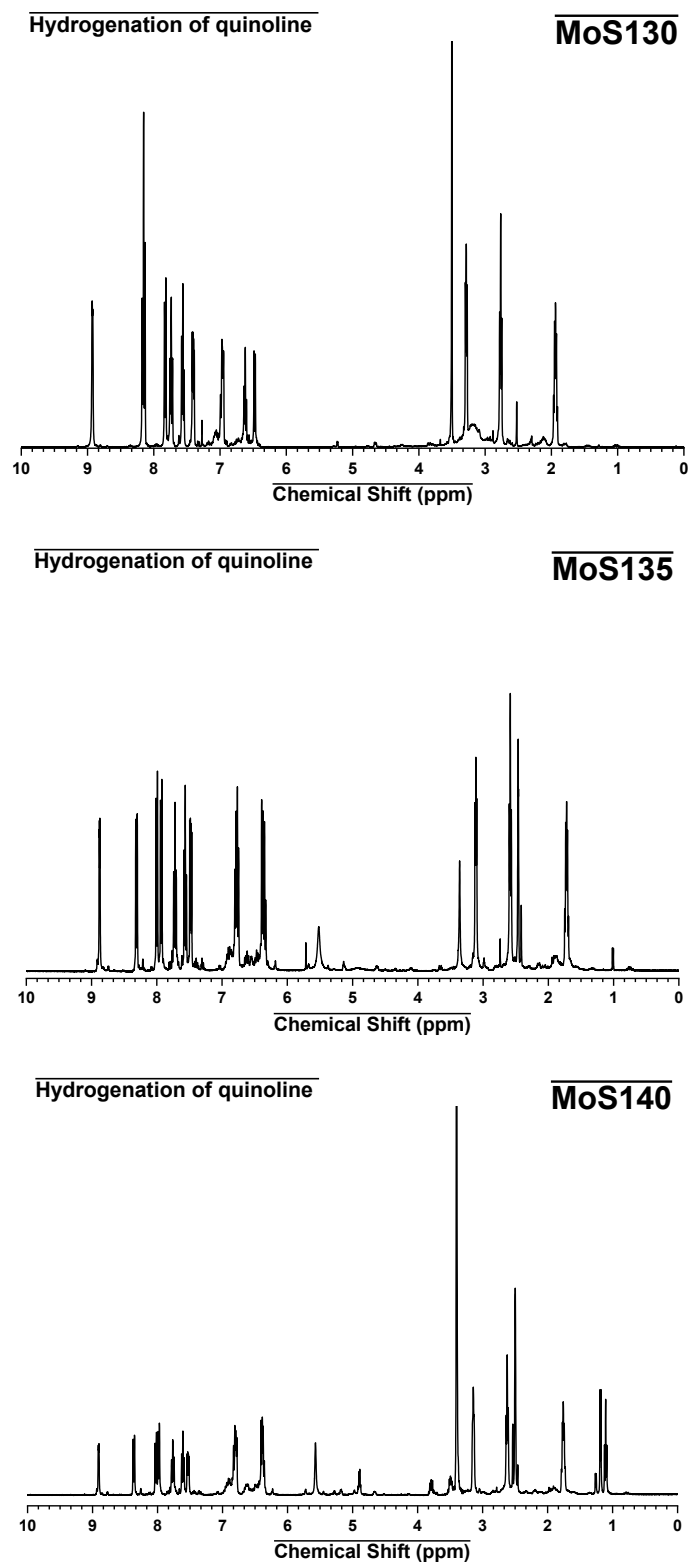

**Fig. S4.** <sup>1</sup>H NMR spectra of the concentrated reaction mixtures after hydrogenation of quinoline in the presence MoS130, MoS135, MoS140 (100 °C, 100 atm, 10 mol. % of MoS<sub>2</sub>, 24 h).



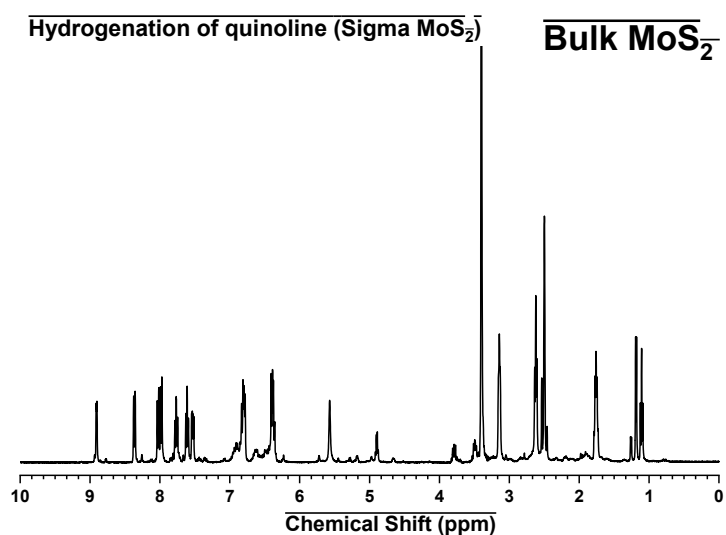

**Fig. S5.**  $^1\text{H}$  NMR spectra of the concentrated reaction mixture after hydrogenation of quinoline in the presence of bulk  $\text{MoS}_2$  (10 mol. % of  $\text{MoS}_2$ , 100 °C, 100 atm, 24 h).

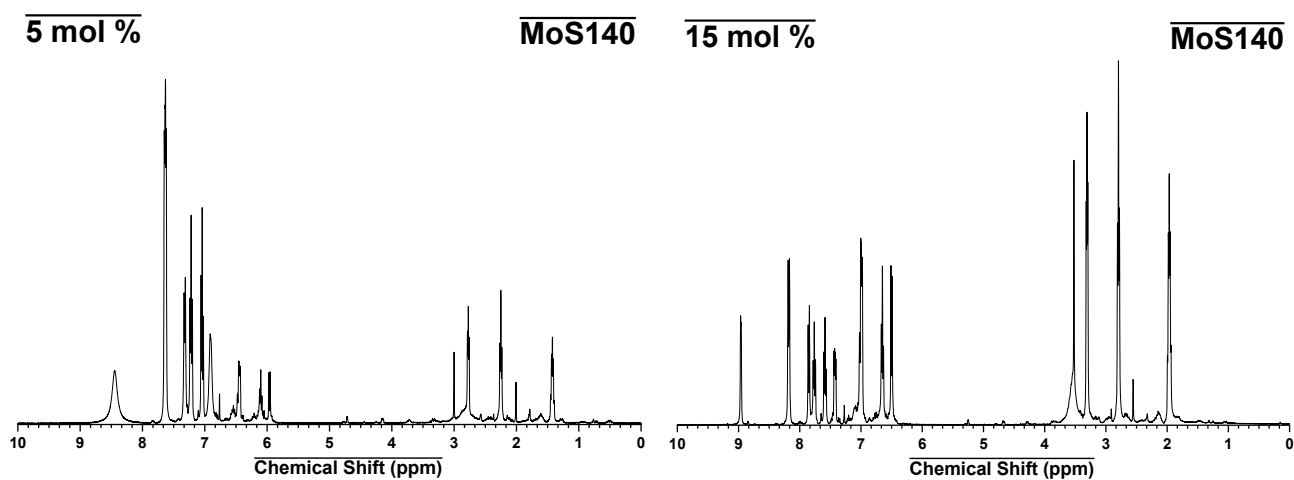

**Fig. S6.**  $^1\text{H}$  NMR spectra of the concentrated reaction mixtures after hydrogenation of quinoline in the presence of  $\text{MoS}_{140}$  (100 °C, 100 atm, 24 h) at different catalyst loadings. Catalyst loading is shown as the spectrum legend.

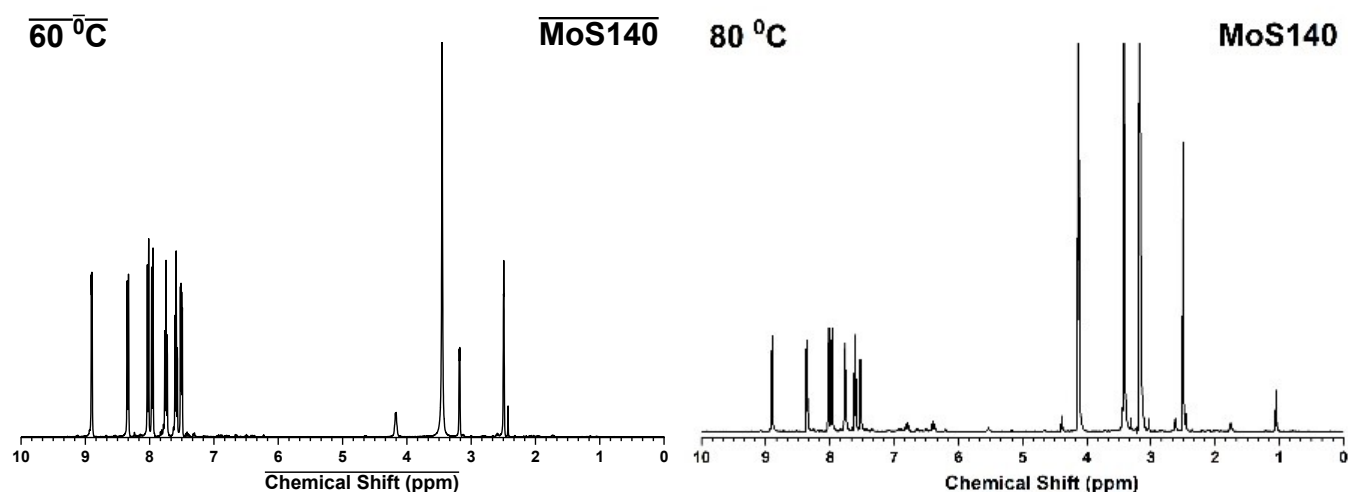

**Fig. S7.**  $^1\text{H}$  NMR spectra of the concentrated reaction mixtures after hydrogenation of quinoline at different temperatures in the presence MoS140 (10 mol. % of  $\text{MoS}_2$ , 100 atm, 24 h). Temperature is shown as the spectrum legend.

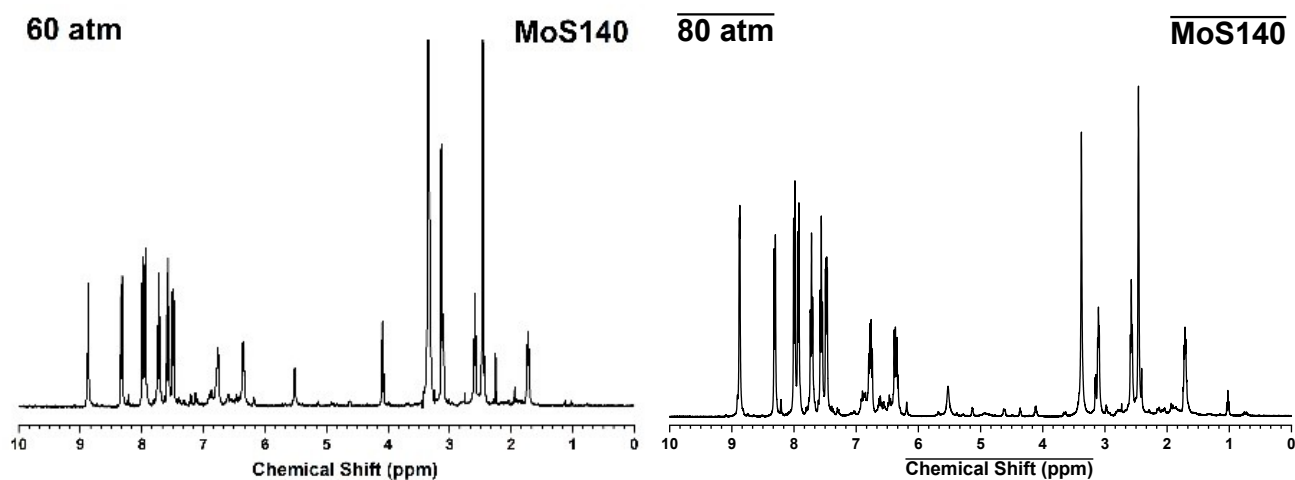

**Fig. S8.**  $^1\text{H}$  NMR spectra of the concentrated reaction mixtures after hydrogenation of quinoline at different pressures in the presence MoS140 (10 mol. % of  $\text{MoS}_2$ , 100 °C, 24 h). Hydrogen pressure is shown as the spectrum legend.

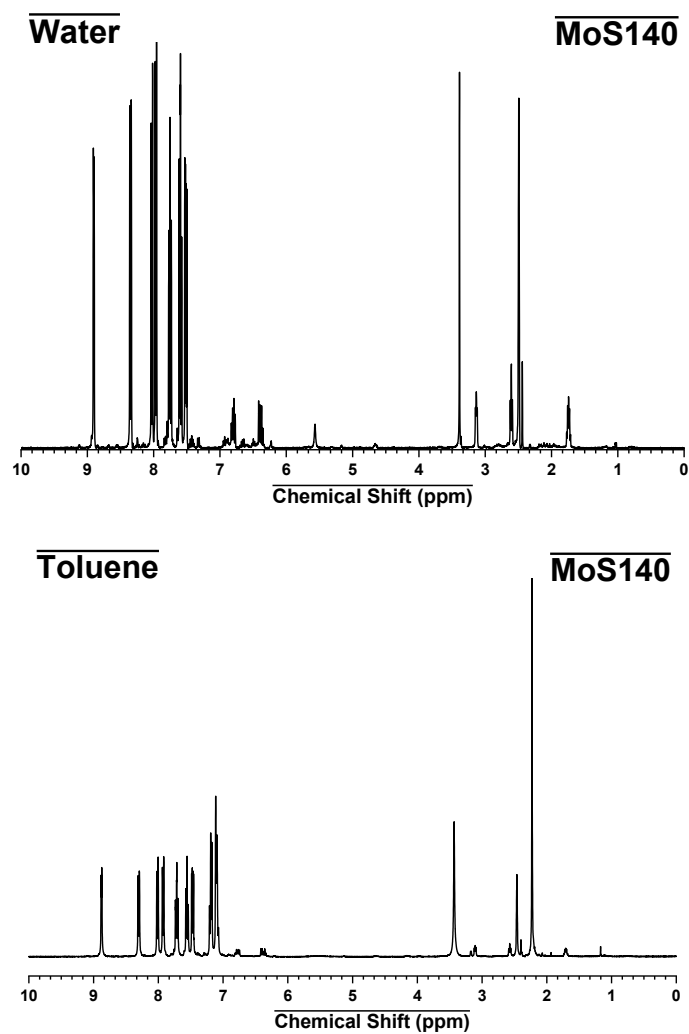

**Fig. S9.**  $^1\text{H}$  NMR spectra of the concentrated reaction mixtures after hydrogenation of quinoline the presence MoS140 (10 mol. % of  $\text{MoS}_2$ , 100  $^\circ\text{C}$ , 100 atm, 24 h) in water or toluene.

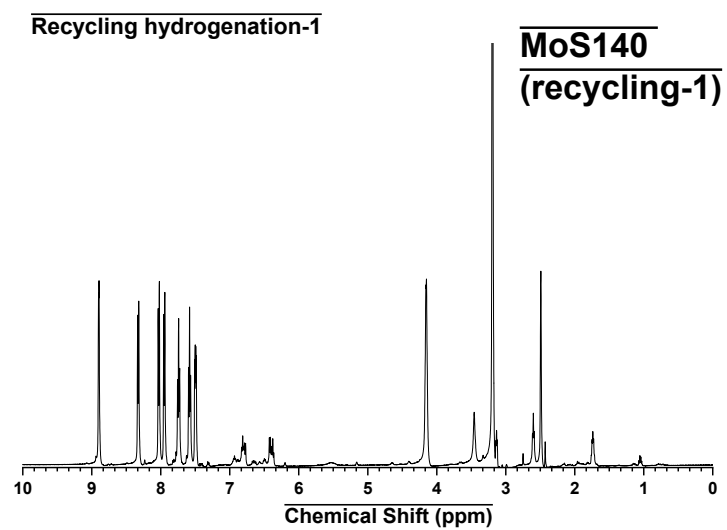

**Fig. S10.**  $^1\text{H}$  NMR spectra of the concentrated reaction mixture after hydrogenation of quinoline in the presence of MoS140 recycled after one run (10 mol. % of  $\text{MoS}_2$ , 100  $^\circ\text{C}$ , 100 atm, 24 h).

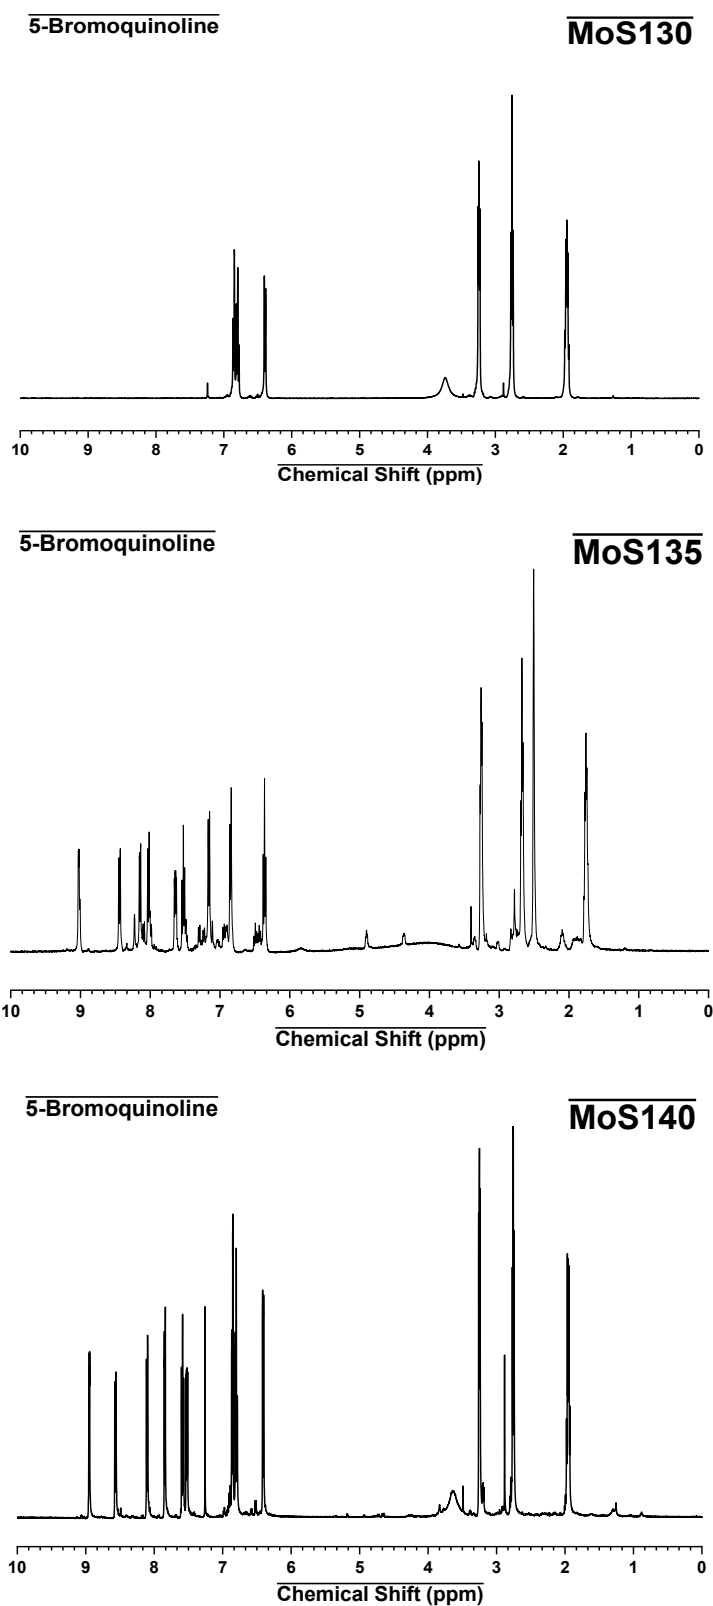

**Fig. S11.**  $^1\text{H}$  NMR spectra of the concentrated reaction mixtures after hydrogenation of 5-bromoquinoline in presence of MoS130, MoS135, MoS140 (100  $^\circ\text{C}$ , 100 atm, 10 mol. % of  $\text{MoS}_2$  48 h).

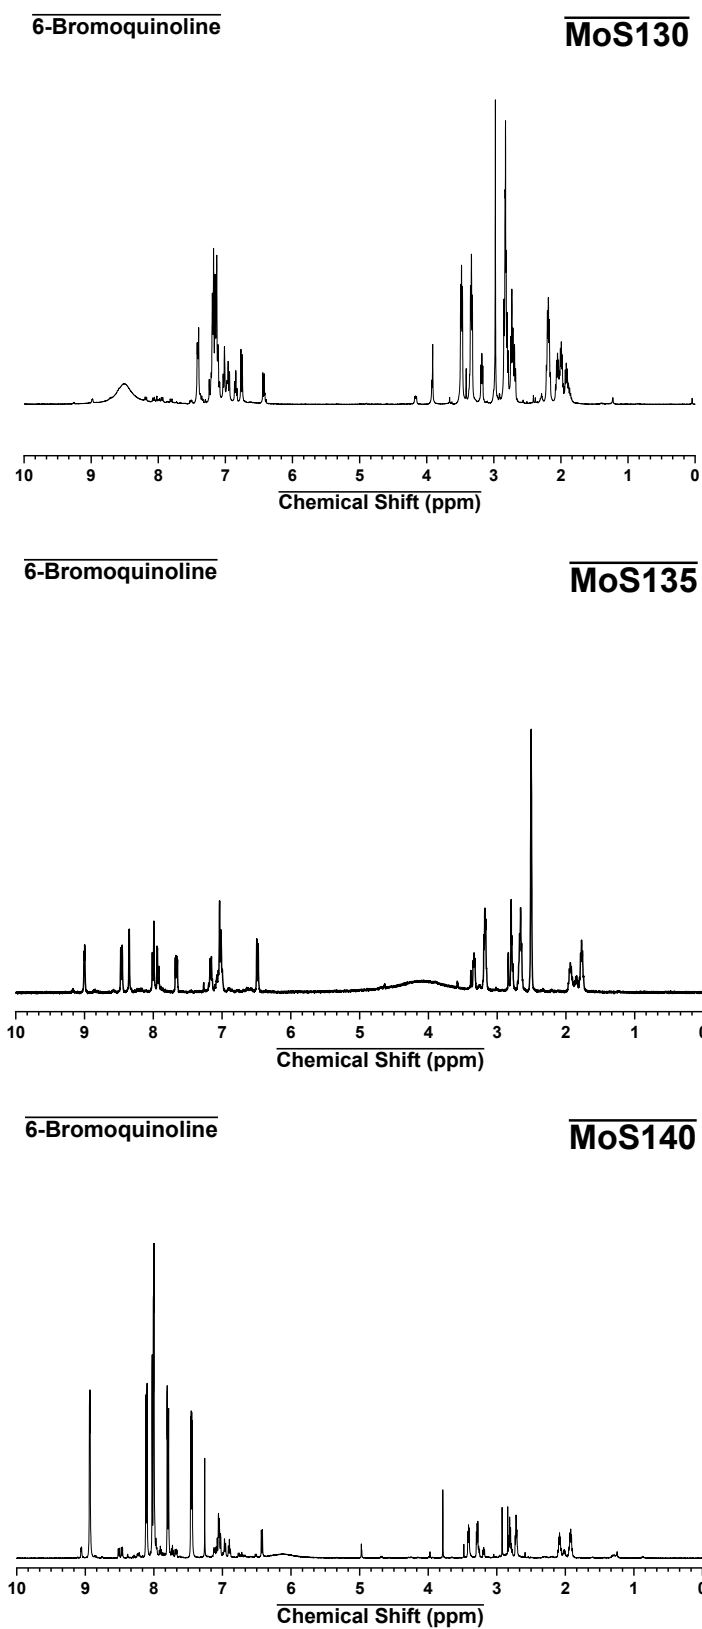

**Fig. S12.**  $^1\text{H}$  NMR spectra of the concentrated reaction mixtures after hydrogenation of 6-bromoquinoline in presence of MoS130, MoS135, MoS140 (100 °C, 100 atm, 10 mol. % of  $\text{MoS}_2$  48 h).

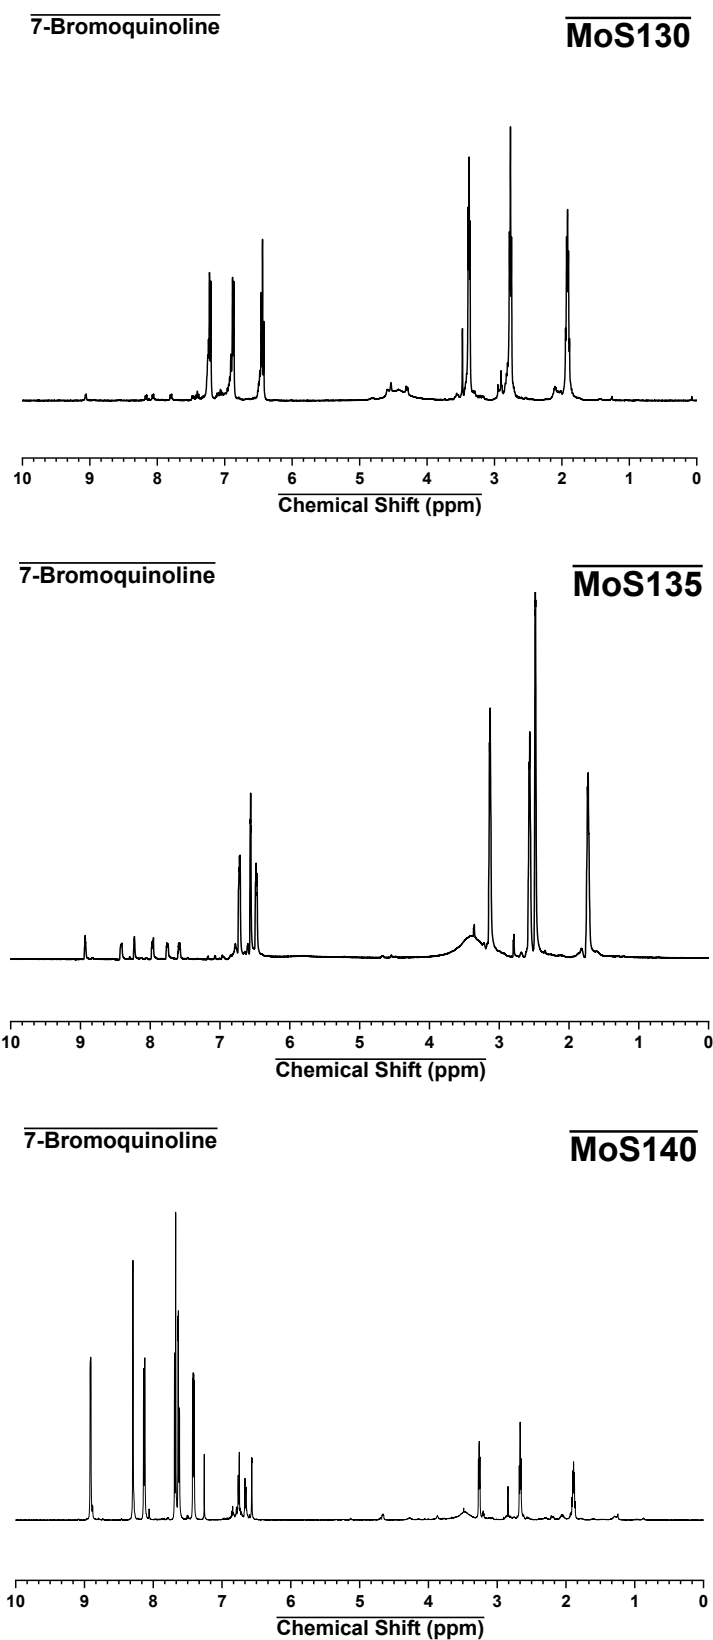

**Fig. S13.**  $^1\text{H}$  NMR spectra of the concentrated reaction mixtures after hydrogenation of 7-bromoquinoline in presence of MoS130, MoS135, MoS140 (100  $^{\circ}\text{C}$ , 100 atm, 10 mol. % of  $\text{MoS}_2$  48 h).

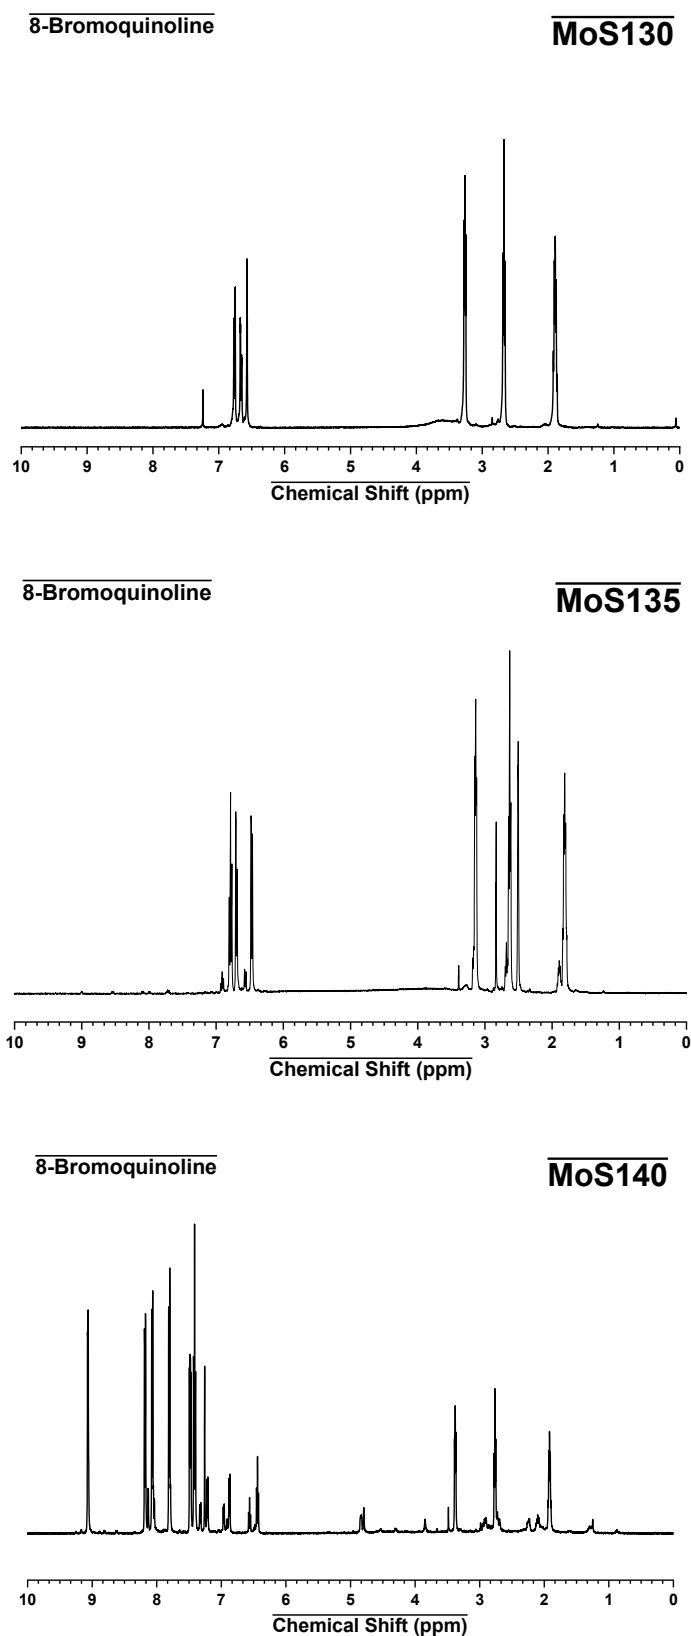

**Fig. S14.** <sup>1</sup>H NMR spectra of the concentrated reaction mixtures after hydrogenation of 8-bromoquinoline in presence of MoS130, MoS135, MoS140 (100 °C, 100 atm, 10 mol. % of MoS<sub>2</sub> 48 h).



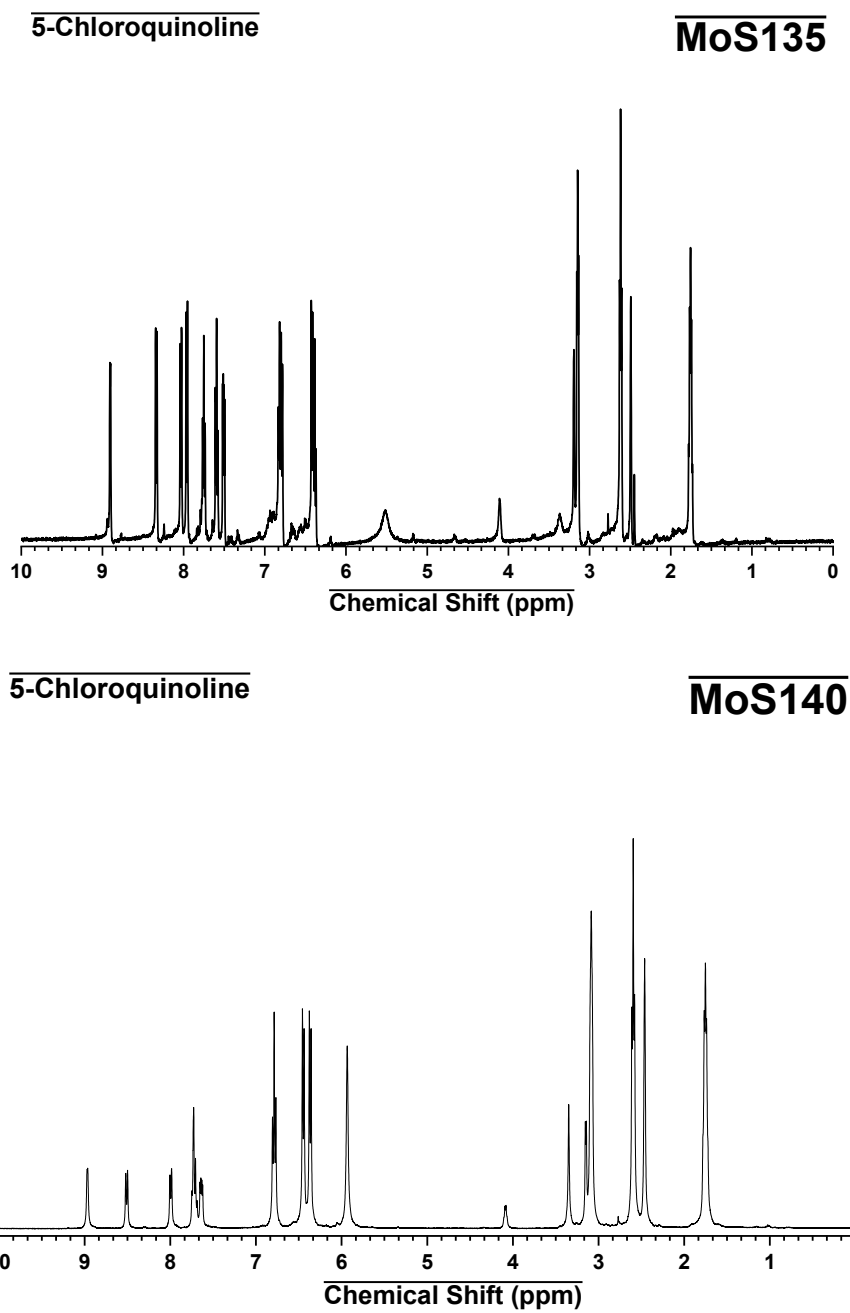

**Fig. S15.**  $^1\text{H}$  NMR spectra of the concentrated reaction mixtures after hydrogenation of 5-chloroquinoline in presence MoS135, MoS140 (100 °C, 100 atm, 10 mol. % of  $\text{MoS}_2$  48 h).

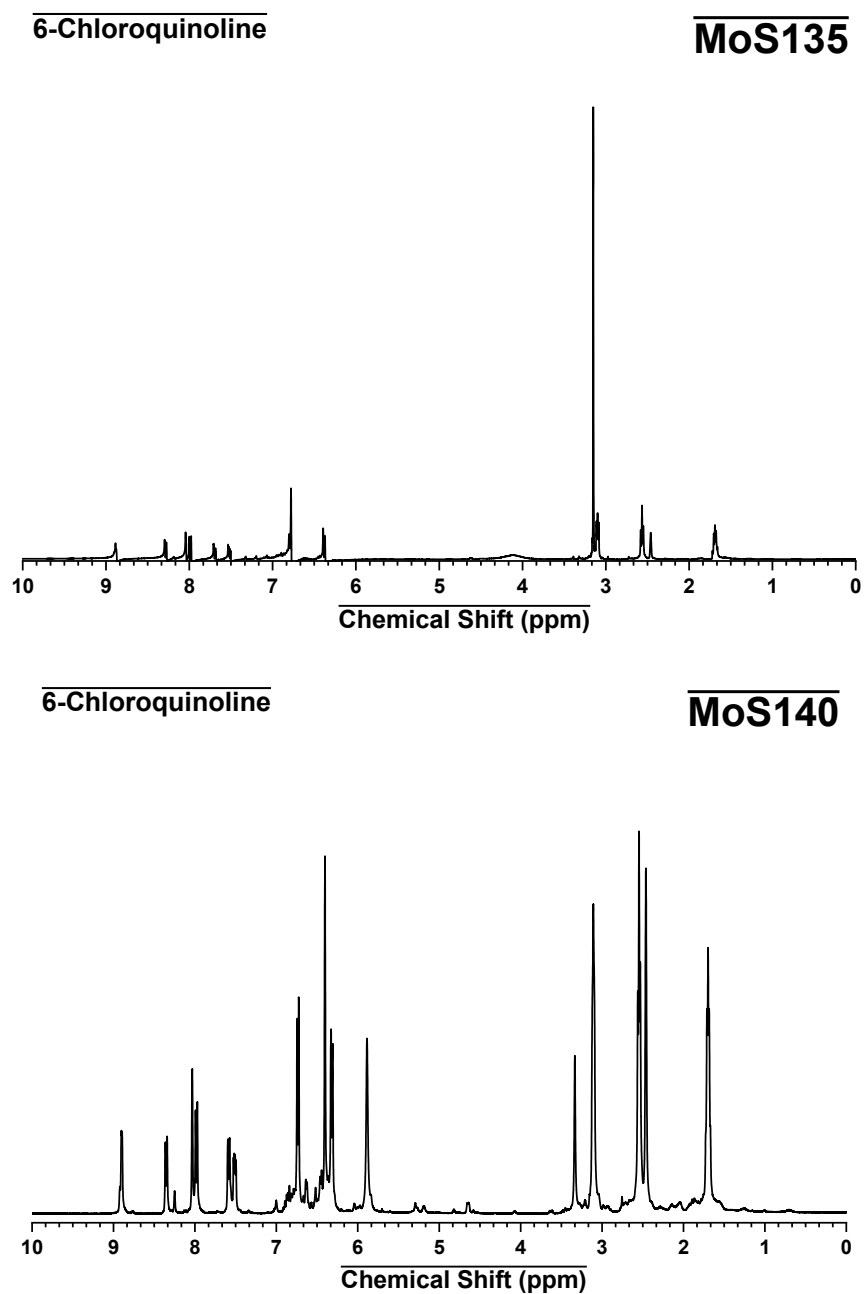

**Fig. S16.**  $^1\text{H}$  NMR spectra of the concentrated reaction mixtures after hydrogenation of 6-chloroquinoline in presence MoS135, MoS140 (100 °C, 100 atm, 10 mol. % of  $\text{MoS}_2$  48 h).

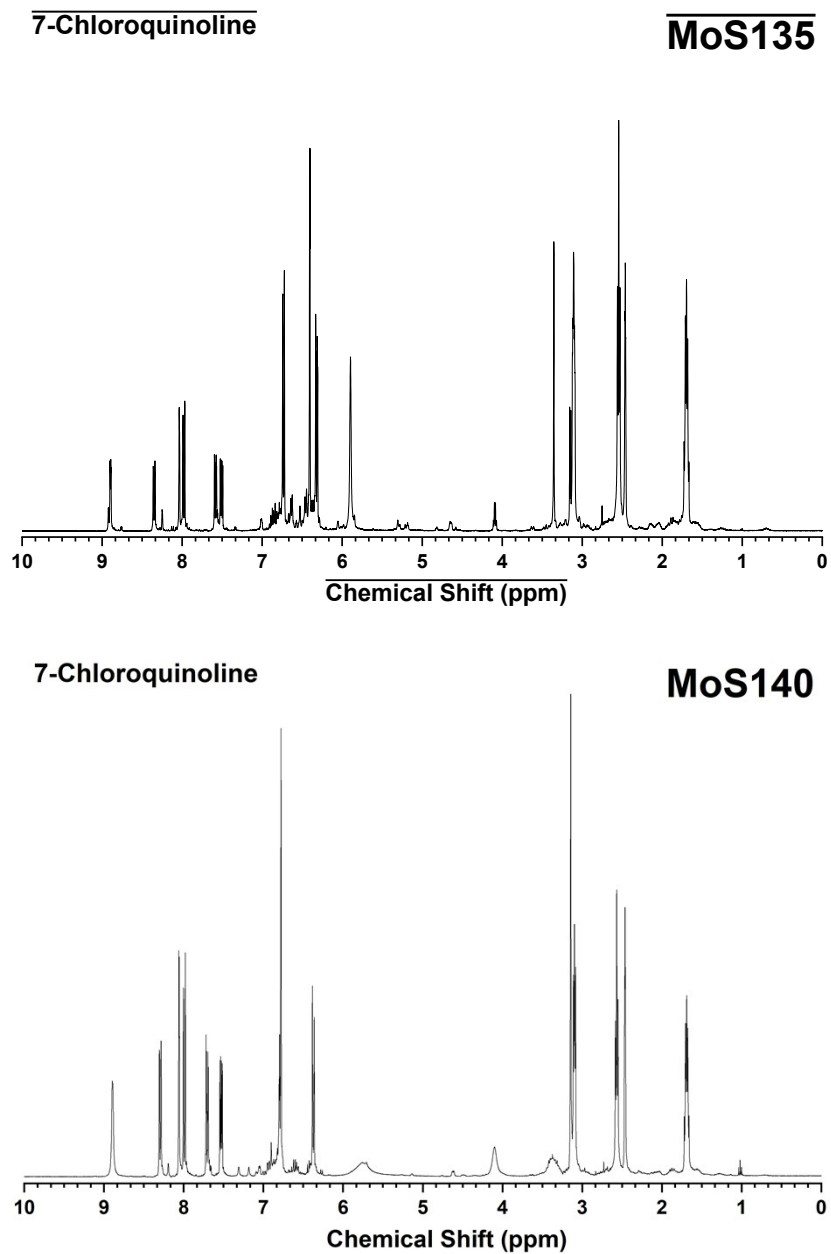

**Fig. S17.**  $^1\text{H}$  NMR spectra of the concentrated reaction mixtures after hydrogenation of 7-chloroquinoline in presence MoS135, MoS140 (100 °C, 100 atm, 10 mol. % of  $\text{MoS}_2$  48 h).

8-Chloroquinoline

MoS135

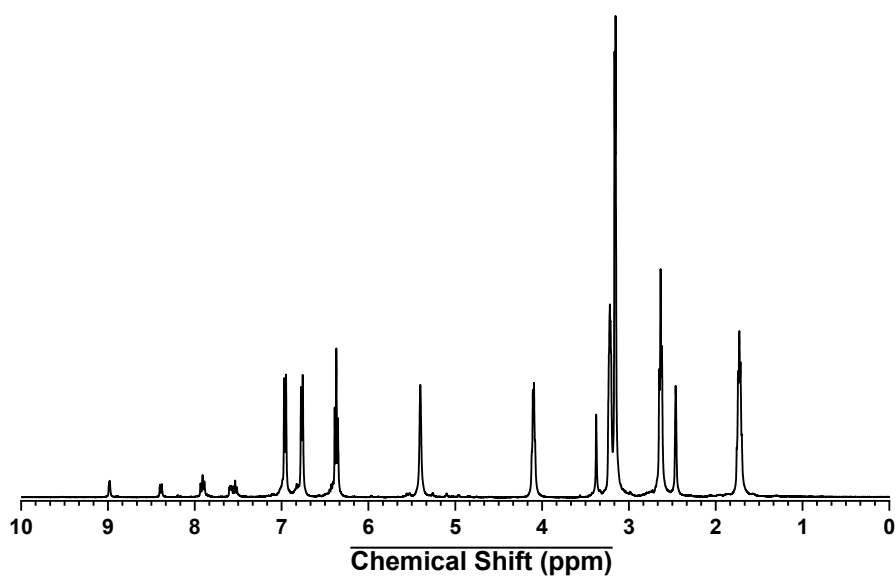

8-Chloroquinoline

MoS140

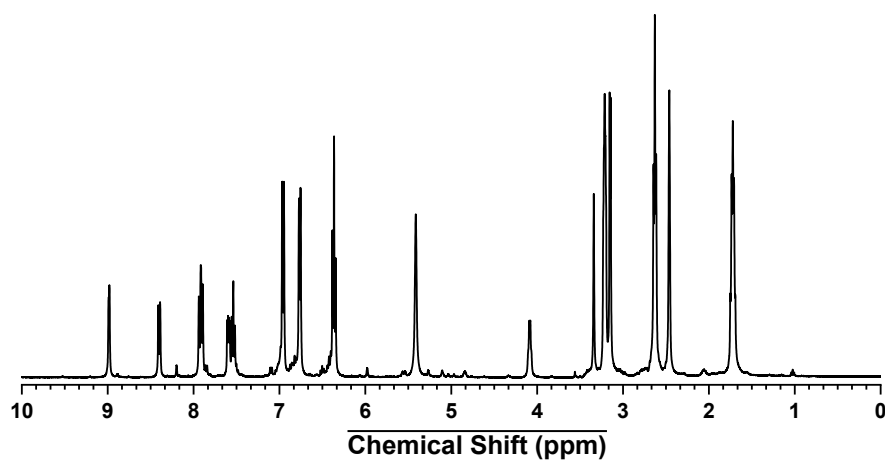

**Fig. S18.** <sup>1</sup>H NMR spectra of the concentrated reaction mixtures after hydrogenation of 8-chloroquinoline in presence MoS135, MoS140 (100 °C, 100 atm, 10 mol. % of MoS<sub>2</sub> 48 h).

## References for Supporting Information

1. J. Gao, B. Li, J. Tan, P. Chow, T.-M. Lu, N. Koratkar, Aging of Transition Metal Dichalcogenide Monolayers, *ACS Nano*, 2016, **10**, 2628–2635. <https://doi.org/10.1021/acsnano.5b07677>.
